# Supplementary material
Source: Research Square preprint supplement (doi:10.21203/rs.3.rs-9300046/v1)
Supplement: Supplementary file 1 [file b215b0213ffd527987b68e16.docx]

| **Primer** | **Nucleotide sequence** **(5'--3')** |
| --- | --- |
| KT-F1  KT-R1  KT-F2  KT-R2 | TGCATGAGGCAGAACCTAAGGTTATCCATCAGGCGCTGGGATAAGCTGTCAAACATGAG  CTCTTCTTCAATGAAGCGGAAAGGACGTTCTTCTCCCAAGTGTAGGCTGGAGCTGCTTC  AAAGGCAGTAGCTTCACTTTATCTGTGGTTCATCTGCATGAGGCAGAACCTAAGGTTA  TCCTCCGAACAAGCGTTTGAGGAAGCCTTTCTTCTCTTCTTCAATGAAGCGGAAAGG |
| ID-F  ID-R | ATGTCAAACACGCCAATCGAGCT  TCCTCCGAACAAGCGTTTGAGGA |

**I. Table S1 | Primers**

**II. Table S2 |DNA sequence**

| **Name** | **Source plasmid** | **Nucleotide sequence** **(5'--3')** |
| --- | --- | --- |
| Replaced sequences  J61100 rbs  OmpA rbs | pUC19-eGFP  pUC19- J61100/eGFP  pUC19-OmpA/eGFP | GCATGCCTGCAGGTCGACTCTAGAGGAT  CCCCG  GAAAGAGGGGACAA  ATAACGAGGGCAAAAA |
