# Supplementary material
Source: Research Square preprint supplement (doi:10.21203/rs.3.rs-9300046/v1)
Supplement: Supplementary file 2 [file ee63b4a4abc9c5a7f7437cb9.docx]

| **Strain/plasmid/gene** | **Genotype or description** | **Reference or source** | **GenBank accession No. or Gene ID No.** |
| --- | --- | --- | --- |
| **Strains** |  |  |  |
| ECN  ΔECN | *Escherichia coli Nissle* 1917, O6:K5:H1  ECNΔ*minCD*::*kan*, KanR | Biobw (Bei jing)    This study | NZ_CP022686 |
| **Plasmids** |  |  |  |
| pKD13  pKD46  pUC19-eGFP  pUC19-OmpA-eGFP  pUC19-J61100-eGFP  **Genes**  *minC*  *minD* | Template plasmid, suicide vector, AmpR , KanR  Red recombinase plasmid, temperature sensitive, AmpR  includes *eGFP*, *lac promoter*,AmpR  includes OmpA rbs-eGFP, AmpR  includes J61100 rbs-eGFP, AmpR  Z-ring positioning protein MinC  Z-ring positioning protein MinD | This laboratory  This laboratory  Genecarer (Xi’an)  This study  This study | AY048744.1  MF287367.1  945744  945741 |

Table 1 Key strains, plasmids and genes used in this study.
